# Supplementary material for: Effects of Vitamin D Supplementation on Bone Turnover and Bone Mineral Density in Healthy Men: A Post-Hoc Analysis of a Randomized Controlled Trial
Source: MDPI journal article supplement (doi:10.3390/nu11040731), 2019-03-29

Supplemental figure 1: 25(OH)D levels at baseline and after 12 weeks in the placebo group. Paired student's T-test was used for comparisons of 25(OH)D levels at baseline and follow-up

Figure 1a: All subjects (n=96),  $p < 0.001$

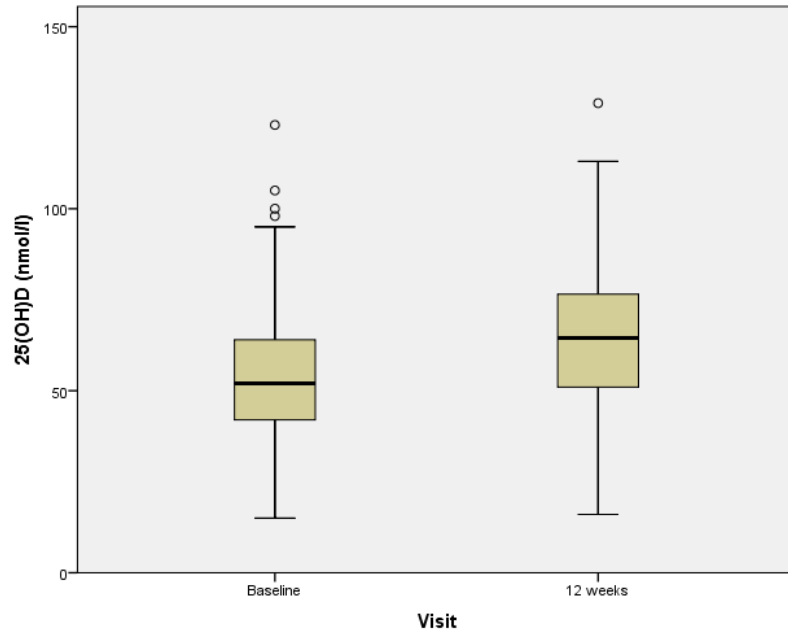

Figure 1b: Subjects with a baseline 25(OH)D level  $< 40$  nmol/l (n=16),  $p = 0.051$

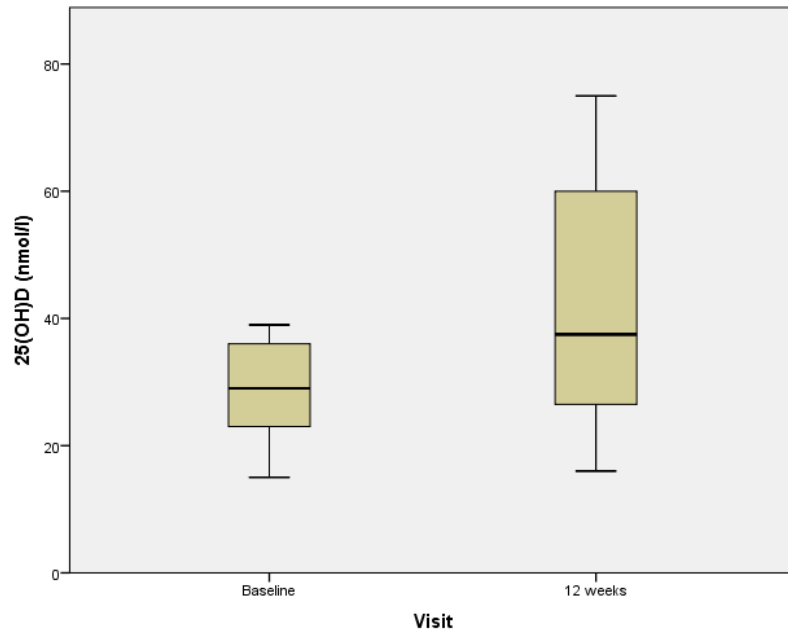

Figure 1c: Subjects with a baseline 25(OH)D level  $\geq 40$  nmol/l (n=80), p<0.001

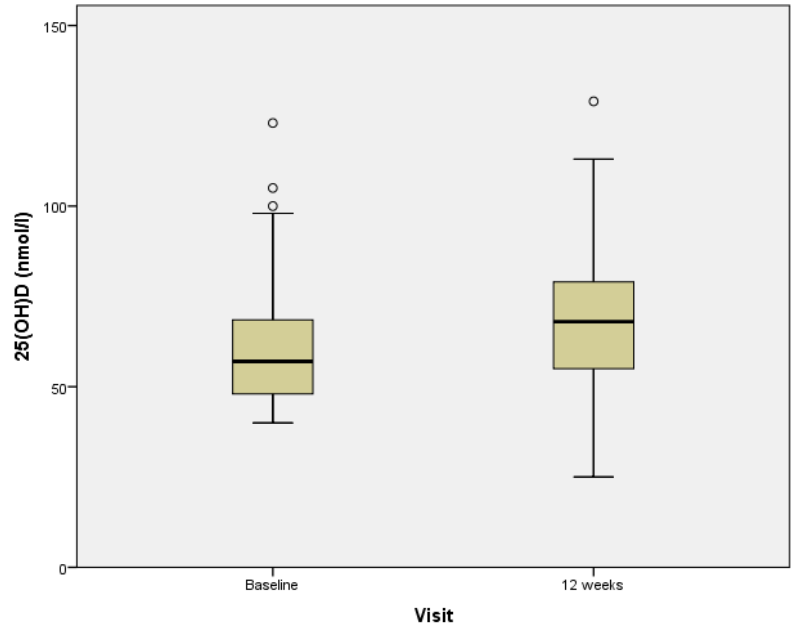

Figure 1d: Subjects with a BMI <25 kg/m<sup>2</sup> (n=32), p=0.008

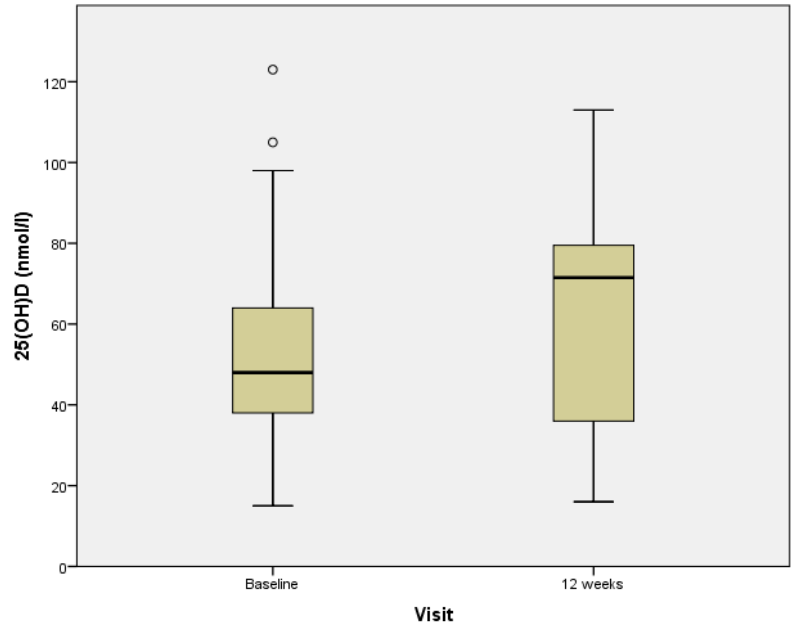

Figure 1e: Subjects with a BMI  $\geq 25$  kg/m<sup>2</sup> (n=64), p<0.001

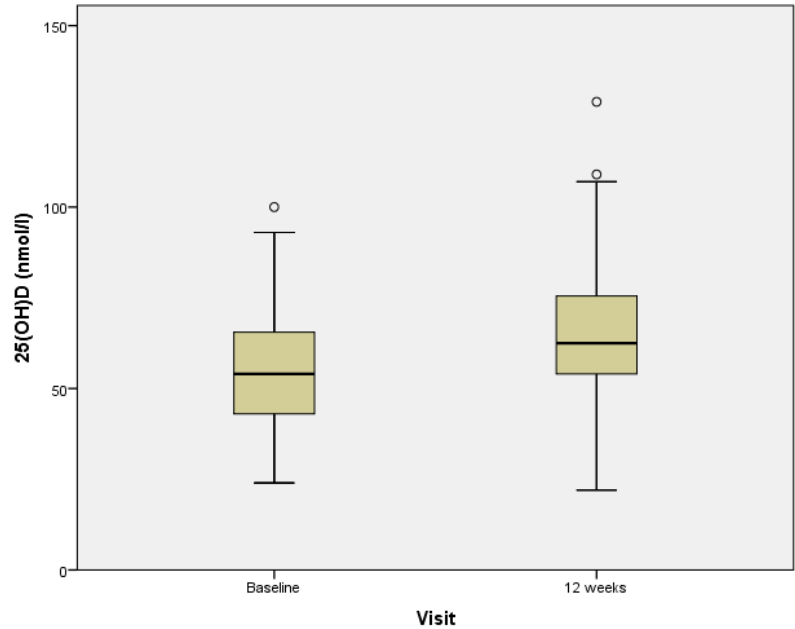

Figure 1f: Subjects with a baseline TT level <10.41 nmol/l (n=47), p<0.001

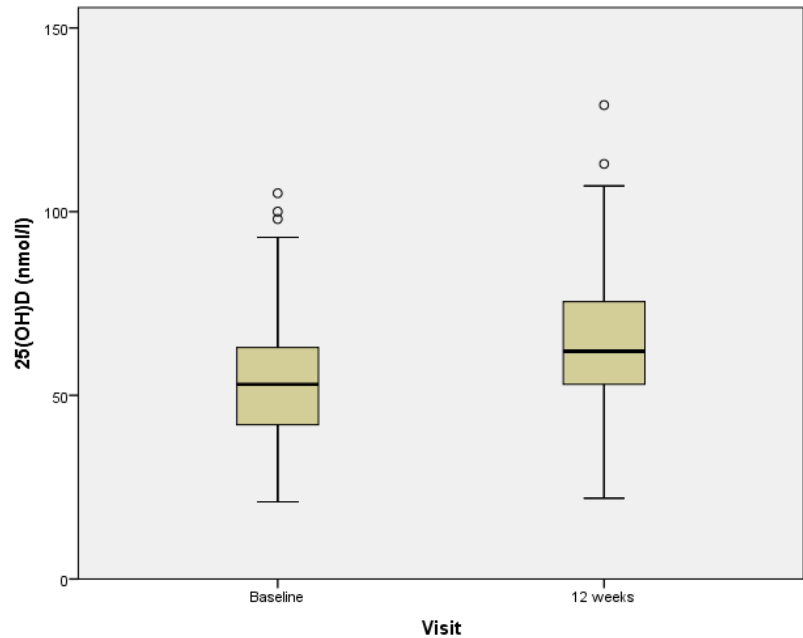

Figure 1g: Subjects with a baseline TT level  $\geq 10.41$  nmol/l (n=49), p=0.001

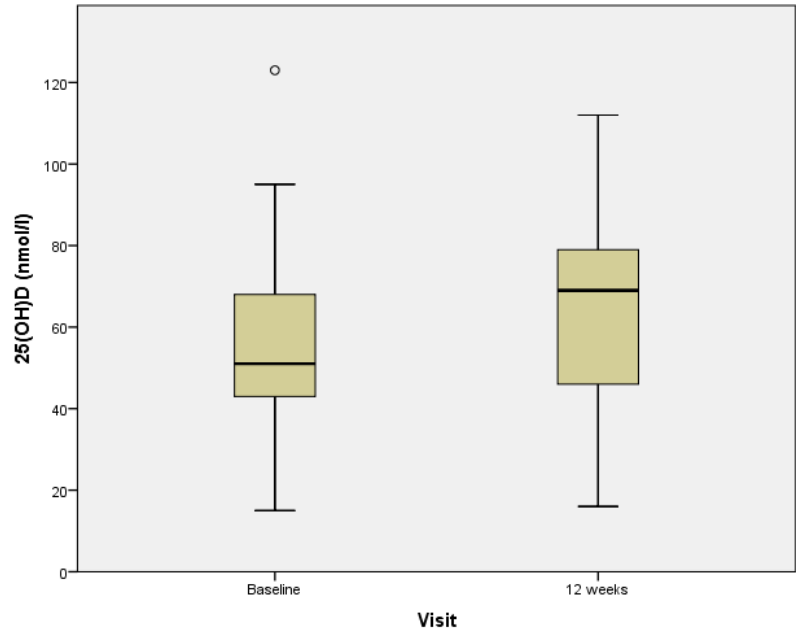

Supplement: s1 [file s1]
